# Supplementary material for: Performances of the Canadian Agility and Movement Skill Assessment (CAMSA), and validity of timing components in comparison with three commonly used agility tests in Chinese boys: an exploratory study
Source: PeerJ. 2020 Mar 23;8:e8784. doi: 10.7717/peerj.8784 (PMC7098388; doi:10.7717/peerj.8784)
Supplement: File S1 [file peerj-08-8784-s001.xlsx]

## Sheet: Sheet1
Code number	Age(years)	Athletic experiences	Height(cm)	Weight(kg)	BMI(kg/㎡)	50-m sprint(s)	RSS-1MD(times)		RSS-HHD(times)		IAT(s)		CAMSA
							Timed trial 1	Timed trial 2	Timed trial 1	Timed trial 2	Timed trial 1	Timed trial 2	Timed trial 1														Timed trial 2
													completion time(s)	time score	skill score	one-foot jumping	sliding	catch	throw	skipping	two-foot hopping	kick	total score	skii score(A)	skii score(B)	skii score(C)	completion time(s)	time score	skill score	one-foot jumping	sliding	catch	throw	skipping	two-foot hopping	kick	total score	skii score(A)	skii score(B)	skii score(C)
1	10	1	143.5	30.4	14.8	8.23	35	34	39	48	19.05	19.34	13.4	14	13	2	3	1	1	2	2	2	27	8	9	12	12.06	14	12	1	3	1	1	2	2	2	26	9	10	10
2	10	1	138.5	28.6	14.9	8.56	30	37	47	48	20.15	20.94	14.15	13	10	1	2	1	1	2	1	2	23	11	12	10	12.79	14	12	2	3	1	2	2	0	2	26	12	10	12
3	10	1	142.5	31.6	15.6	8.47	41	39	48	53	19.68	19	11.49	14	12	2	3	1	1	2	1	2	26	9	9	10	12.18	14	11	1	3	1	1	2	2	1	25	9	9	11
4	10	0	139.5	31.3	16.1	10.54	32	31	30	35	22.49	23.17	18.15	9	12	2	3	1	1	2	1	2	21	12	9	11	16.05	11	12	2	3	1	1	2	1	2	23	12	12	12
5	10	1	158.5	40.5	16.1	9.59	30	37	39	41	22.28	20.68	20.06	7	13	2	3	1	1	2	2	2	20	13	13	13	18.65	9	13	2	3	1	1	2	2	2	22	13	13	13
6	10	1	146.5	35.7	16.6	8.41	35	38	47	50	19.2	19.37	13.77	14	13	2	2	1	2	2	2	2	27	11	10	13	12.28	14	11	1	3	1	1	2	1	2	25	11	10	12
7	10	0	140	32.8	16.7	10.62	24	27	35	35	23.14	26.8	17.61	10	9	2	2	1	1	2	0	1	19	9	8	11	16.91	11	10	2	2	1	1	2	0	2	21	11	9	13
8	10	1	150.5	38.3	16.9	8.78	33	32	39	40	20.87	21.46	16.05	11	12	2	3	0	1	2	2	2	23	10	10	10	14.13	13	12	1	3	1	1	2	2	2	25	11	12	12
9	10	1	139.5	33.3	17.1	9.39	33	35	30	44	20.84	20.12	15.18	12	13	2	3	1	1	2	2	2	25	11	12	13	12.9	14	12	1	3	1	1	2	2	2	26	11	10	12
10	10	1	143.5	35.5	17.2	8.15	35	36	45	42	19.83	19.37	12.28	14	11	1	2	1	1	2	2	2	25	11	11	12	14	13	11	1	2	1	1	2	2	2	24	11	9	12
11	10	0	158.5	43.5	17.3	9.97	33	35	35	33	21.12	21.03	17.27	10	13	2	3	1	1	2	2	2	23	10	11	12	16.83	11	13	2	3	0	2	2	2	2	24	11	12	12
12	10	1	149	38.6	17.4	8.09	42	37	51	51	18.64	18.52	11.02	14	12	1	3	1	1	2	2	2	26	9	9	10	11.62	14	11	1	3	1	1	2	1	2	25	11	9	11
13	10	0	145.5	37.2	17.5	11.06	28	27	34	31	26.03	27.65	19.87	8	11	2	3	0	1	2	1	2	19	12	10	11	19.98	8	9	2	2	1	1	2	1	0	17	8	7	10
14	10	0	158	44.3	17.7	11.21	26	25	29	29	24.93	27.22	20.32	7	9	2	3	1	1	1	0	1	16	9	8	10	21.09	6	9	2	3	1	1	0	0	2	15	9	9	11
15	10	1	153	41.7	17.8	8.4	42	39	35	47	19.9	20.18	12.15	14	13	2	3	1	1	2	2	2	27	11	11	12	11.95	14	11	1	3	1	1	2	1	2	25	10	9	11
16	10	0	137.5	34.1	18	12.38	25	25	26	18	25.22	27.18	18.47	9	12	2	3	1	1	2	1	2	21	11	8	10	18.32	9	11	2	3	1	1	2	0	2	20	11	10	12
17	10	0	149	40.4	18.2	9.99	32	25	44	45	22.48	22.12	14.47	13	13	2	3	1	1	2	2	2	26	13	13	13	14.37	13	12	2	3	1	1	1	2	2	25	13	12	12
18	10	1	137.5	34.4	18.2	8.15	42	41	50	43	19.81	19.48	11.93	14	10	2	0	1	1	2	2	2	24	8	10	10	14	13	12	2	3	1	1	2	1	2	25	11	10	11
19	10	0	142.5	37	18.2	10.75	27	26	21	28	23.9	24.22	16.12	11	12	1	3	1	2	2	1	2	23	13	12	13	15.76	12	12	2	3	1	1	2	1	2	24	11	11	11
20	10	0	148.5	40.4	18.3	10.59	25	26	32	31	23.55	23.62	19.56	8	11	2	2	1	1	2	1	2	19	10	8	10	20.51	7	11	2	3	0	2	2	0	2	18	9	9	11
21	10	0	149	41.1	18.5	10.77	26	28	31	24	24.36	25.08	18.01	9	11	2	2	1	1	2	1	2	20	11	11	11	17.24	10	11	2	3	1	1	2	0	2	21	11	11	12
22	10	1	152.5	43.2	18.6	8.47	37	35	44	36	20.77	20.91	16	11	13	2	3	1	1	2	2	2	24	13	13	13	12	14	11	2	1	1	2	2	1	2	25	11	10	12
23	10	0	144.5	40.8	19.5	10.66	31	30	29	29	24.02	25.5	21.56	6	12	2	3	1	1	2	1	2	18	11	8	10	18.45	9	11	2	3	1	1	2	0	2	20	12	9	12
24	10	1	158.5	49.5	19.7	7.91	37	38	46	44	19.06	19.15	14.75	13	12	2	2	1	2	2	1	2	25	13	12	11	13.38	14	11	2	2	1	1	2	1	2	25	12	11	12
25	10	0	154	47.2	19.9	9.99	34	35	35	33	20.84	22.67	16.02	11	13	2	3	1	1	2	2	2	24	12	12	13	15.45	12	13	2	3	1	1	2	2	2	25	11	13	13
26	10	0	150.5	45.9	20.3	9.21	35	33	43	45	19.93	20.27	12.94	14	13	2	3	1	1	2	2	2	27	9	10	10	14.28	13	11	2	3	1	1	2	0	2	24	13	13	13
27	10	0	146	43.4	20.3	11.4	22	24	25	27	24.49	25.09	15.7	12	8	1	3	1	2	0	0	1	20	10	10	11	16.55	11	12	2	3	1	1	2	1	2	23	9	9	7
28	10	0	162	53.6	20.4	10.92	24	23	25	25	25.92	27.9	22.06	5	12	2	3	1	1	2	1	2	17	11	12	13	22.72	5	13	2	3	1	1	2	2	2	18	11	11	12
29	10	1	154.5	49.4	20.7	8.86	34	37	44	52	19.26	19.68	13.67	14	9	2	0	1	1	2	1	2	23	9	11	11	11.43	14	11	2	2	1	1	2	1	2	25	9	10	12
30	10	0	153	48.6	20.8	13.98	28	29	34	33	26.87	26.68	18.54	9	12	2	3	1	1	2	1	2	21	10	10	11	19.07	8	11	2	3	1	1	2	0	2	19	10	10	12
31	10	0	151	50.6	22.2	11.37	26	25	33	31	23.95	24.49	19.99	8	11	2	3	1	1	2	1	1	19	11	8	11	18	9	12	2	3	1	1	2	1	2	21	10	12	12
32	10	0	146.5	47.7	22.2	10.03	30	31	35	34	21.76	23.76	18.9	9	12	2	3	1	1	2	1	2	21	8	10	12	17.84	10	12	2	3	1	2	2	0	2	22	11	13	13
33	10	0	156	54.4	22.4	9.09	39	36	43	43	20.16	20.09	14.29	13	12	2	3	1	1	2	1	2	25	12	12	12	13.31	14	13	2	3	1	1	2	2	2	27	13	12	13
34	10	0	158.5	57	22.7	9.59	34	33	38	36	22.34	21.87	19.23	8	12	2	3	1	1	2	1	2	20	10	12	12	18.12	9	13	2	3	1	1	2	2	2	22	12	10	13
35	10	0	150.5	52.3	23.1	9.25	34	35	47	39	20.99	21.9	15.44	12	14	2	3	1	2	2	2	2	26	14	14	14	14.16	13	14	2	3	1	2	2	2	2	27	14	13	14
36	10	0	154.5	55.7	23.3	10.92	31	30	34	35	24.27	24.79	19.45	8	12	2	3	1	1	2	1	2	20	12	10	12	18.09	9	13	2	3	1	1	2	2	2	22	13	8	11
37	10	0	162	64.6	24.6	11.24	30	32	37	34	25.18	25.26	16.56	11	9	2	3	1	1	0	0	2	20	11	8	9	15.19	12	12	2	3	1	1	2	1	2	24	11	9	11
38	10	0	147	53.4	24.7	10.77	30	27	33	33	23.91	24.65	19.61	8	11	2	3	1	1	2	1	1	19	11	8	11	18.23	9	11	2	2	1	1	2	1	2	20	12	9	12
39	10	0	152	57.1	24.7	10.02	30	27	30	30	24.28	23.64	22.46	5	11	2	3	1	2	2	0	1	16	10	11	10	20.71	7	12	2	2	1	2	2	1	2	19	13	13	11
40	10	0	154.5	60.5	25.3	10.21	25	26	31	32	24.35	24.95	18.81	9	11	2	2	1	2	2	0	2	20	12	12	12	18.28	9	8	2	0	1	2	2	0	1	17	11	9	10
41	10	0	154	60.3	25.4	11.91	24	29	30	30	26.28	26.42	30.18	1	8	2	2	1	1	0	0	2	9	7	7	8	22.55	5	11	2	3	1	1	2	0	2	16	9	8	11
42	10	0	164	68.7	25.5	9.77	33	26	41	37	20.99	21.68	19.46	8	13	2	3	1	1	2	2	2	21	13	12	13	16.42	11	12	2	3	1	1	2	1	2	23	12	10	12
43	10	0	143.5	52.9	25.7	14.01	26	24	27	30	28.41	30.28	22.21	5	11	1	3	1	1	2	2	1	16	12	9	12	19.42	8	10	2	3	1	1	1	0	2	18	9	9	9
44	10	0	157.5	64.1	25.8	13.22	22	25	34	32	26.05	26.67	21.03	6	10	2	2	1	1	2	0	2	16	11	10	10	20.31	7	11	2	2	1	2	2	0	2	18	9	10	9
45	10	0	144	53.9	26	11.96	22	21	31	32	27.13	27.82	29.17	2	11	2	3	0	2	2	0	2	13	10	8	11	23.82	5	11	2	3	1	1	2	0	2	16	11	7	9
46	10	1	161	68.2	26.3	10.17	41	42	34	44	22.86	21.5	14.88	13	14	2	3	1	2	2	2	2	27	14	14	14	13.3	14	13	2	3	1	1	2	2	2	27	13	12	13
47	10	0	154.5	65.2	27.3	11.09	31	31	35	32	23.84	24.7	22.05	5	11	1	3	1	2	2	0	2	16	11	8	10	18.53	9	11	2	3	1	1	2	1	1	20	12	10	12
48	10	0	156	67.2	27.6	10.73	20	20	24	21	30.09	33.46	25.01	4	10	2	3	1	1	2	0	1	14	10	8	10	32.04	1	9	2	3	1	1	0	0	2	10	11	8	9
49	10	0	159.5	80.2	31.5	10.37	30	33	34	34	26.84	26.47	17.14	10	10	1	3	1	1	2	0	2	20	10	9	8	19.2	8	10	2	2	1	1	2	0	2	18	11	10	9
50	9	1	140	27.5	14	8.43	31	30	36	44	18.9	18.58	12.28	14	13	2	3	1	1	2	2	2	27	12	12	11	12.91	14	11	1	2	1	1	2	2	2	25	12	12	11
51	9	1	141	30	15.1	8.81	36	39	42	41	18.97	18.96	14.75	13	11	1	3	1	1	2	2	1	24	9	8	10	13.39	14	9	1	2	1	1	0	2	2	23	11	9	12
52	9	1	140	30	15.3	8.41	39	39	33	39	19.14	18.82	13.16	14	13	2	3	1	1	2	2	2	27	12	11	12	12.99	14	13	2	3	1	1	2	2	2	27	12	12	13
53	9	0	135.7	28.5	15.5	9.43	25	29	37	35	22.93	22.82	18.47	9	13	2	3	1	1	2	2	2	22	12	10	12	19.03	8	10	2	2	1	1	0	2	2	18	7	9	10
54	9	0	127	25.5	15.8	10.15	31	33	40	39	23.43	24.98	19.46	8	11	2	3	1	1	2	0	2	19	11	11	11	19.34	8	13	2	3	1	2	2	1	2	21	13	13	13
55	9	1	136.5	29.8	16	8.45	34	35	43	41	19.4	19.09	15.09	12	13	2	3	1	1	2	2	2	25	10	11	12	12.51	14	14	2	3	1	2	2	2	2	28	14	14	14
56	9	0	137.5	30.5	16.1	9.31	35	35	44	43	19.24	19.93	14.81	13	14	2	3	1	2	2	2	2	27	14	14	14	14.4	13	14	2	3	1	2	2	2	2	27	14	14	14
57	9	0	141.3	34	17	8.6	23	30	33	31	25.78	27.96	21.16	6	13	2	3	1	1	2	2	2	19	11	12	13	17.93	10	12	2	3	1	1	2	2	1	22	10	10	12
58	9	0	125.5	27	17.1	9.62	27	29	35	37	21.16	23.58	18.33	9	12	2	3	1	1	2	1	2	21	12	11	11	16.82	11	12	2	2	1	1	2	2	2	23	13	11	13
59	9	1	139.5	33.5	17.2	8.43	36	37	40	46	20.74	21.22	15.03	12	11	2	0	1	2	2	2	2	23	13	11	13	14.09	13	10	2	0	1	1	2	2	2	23	11	10	10
60	9	0	132.5	30.5	17.4	11.97	21	27	34	35	25.81	24.94	25.78	4	10	2	3	0	1	2	1	1	14	8	7	10	25.68	4	13	2	3	1	1	2	2	2	17	11	11	12
61	9	0	144.5	36.5	17.5	10.18	31	32	31	34	24.28	24.46	21.81	6	13	2	3	1	2	2	1	2	19	12	13	13	20.34	7	12	2	3	1	2	2	1	1	19	11	12	12
62	9	0	141.5	35.1	17.5	10.65	32	36	33	32	24.37	22.66	25.33	4	11	2	3	1	1	2	0	2	15	11	10	11	22.82	5	11	2	3	1	1	2	0	2	16	10	8	11
63	9	1	135.5	32.2	17.5	9.15	31	33	34	39	20.66	21.69	15.02	12	14	2	3	1	2	2	2	2	26	14	14	14	13.74	14	14	2	3	1	2	2	2	2	28	13	12	14
64	9	1	135	32.1	17.6	9.32	30	28	23	33	20.38	20.83	18.34	9	12	2	2	1	1	2	2	2	21	12	13	12	14.12	13	12	2	3	0	1	2	2	2	25	12	12	12
65	9	0	134.6	32	17.7	13.15	21	27	23	27	26.26	27.33	24.4	4	12	2	3	1	1	2	1	2	16	11	8	12	21.58	6	13	2	3	1	2	2	1	2	19	13	10	13
66	9	1	136.5	33	17.7	8.69	34	37	45	45	18.75	19.23	15.41	12	12	1	3	1	1	2	2	2	24	11	11	11	14.47	13	12	2	3	1	1	2	1	2	25	12	12	12
67	9	0	139	34.5	17.9	10.33	27	33	40	39	23.46	24.33	22.5	5	13	2	3	1	1	2	2	2	18	12	9	13	19.55	8	12	2	3	1	1	2	1	2	20	10	12	11
68	9	1	143.5	39.5	19.2	9.53	33	35	45	41	20.99	21.68	17.53	10	12	2	2	1	1	2	2	2	22	12	13	12	17.12	10	10	2	0	1	1	2	2	2	20	13	12	10
69	9	0	141	38.5	19.4	10.45	27	31	29	33	23.85	23.52	20	7	12	2	3	1	1	2	1	2	19	11	10	12	21.56	6	13	2	3	1	1	2	2	2	19	11	10	13
70	9	1	137	36.4	19.4	9.15	32	30	30	30	19.95	20.59	14.15	13	12	2	2	1	1	2	2	2	25	11	11	11	13.62	14	11	1	2	1	1	2	2	2	25	9	10	10
71	9	0	151.3	44.5	19.4	10.33	24	28	30	29	26.34	27.63	20.53	7	14	2	3	1	2	2	2	2	21	14	12	14	20.9	7	12	2	3	1	1	2	2	1	19	8	9	11
72	9	0	143	40	19.6	12.76	27	27	39	38	23.96	24.75	20.15	7	9	2	3	1	1	0	0	2	16	9	8	8	21.95	6	9	1	2	1	2	2	0	1	15	11	9	9
73	9	1	150	45	20	9.88	33	33	41	36	22.39	23.27	19.58	8	13	2	3	1	1	2	2	2	21	13	13	13	18.54	9	12	2	3	1	1	2	1	2	21	12	9	12
74	9	0	140.5	40	20.3	13.51	29	29	29	30	26.68	27.27	23.42	5	11	2	3	1	1	2	0	2	16	10	8	11	23.87	5	10	2	2	1	1	2	0	2	15	8	7	7
75	9	0	138	39	20.5	9.94	30	33	40	38	23.11	23.82	19.87	8	13	2	3	1	1	2	2	2	21	13	11	13	18.28	9	14	2	3	1	2	2	2	2	23	12	13	14
76	9	1	163.5	55	20.6	9.06	30	29	27	29	23.21	22.83	21.05	6	12	1	3	1	1	2	2	2	18	12	12	12	19.51	8	13	2	3	1	1	2	2	2	21	13	13	13
77	9	0	144.5	43	20.6	11.26	29	26	30	28	25.54	24.42	20.01	7	13	2	3	1	2	2	1	2	20	12	12	13	19.68	8	11	1	3	1	2	2	0	2	19	9	7	10
78	9	0	141.7	41.5	20.7	11.03	18	23	17	26	27.51	27.19	32.82	1	10	2	3	1	1	1	0	2	11	9	9	10	28.78	2	8	2	3	0	1	0	0	2	10	9	9	11
79	9	0	143	45	22	12.67	31	29	32	27	28.33	28.82	19.12	8	11	2	2	1	1	2	1	2	19	11	8	12	17.48	10	9	2	2	1	1	0	1	2	19	10	10	10
80	9	0	148.3	48.5	22.1	10.48	37	37	33	36	22.64	24.82	21.06	6	12	2	3	0	1	2	2	2	18	11	11	12	17.48	10	11	2	3	1	1	2	0	2	21	10	11	11
81	9	0	142.5	45	22.2	10.24	25	22	25	27	27.8	27.02	31.18	1	11	2	3	1	2	0	1	2	12	11	11	11	28.84	2	11	2	3	1	2	0	1	2	13	11	9	11
82	9	0	152.5	52	22.4	12.67	23	23	20	20	31.44	29.37	35.04	1	5	1	2	0	0	0	0	2	6	6	4	6	27.88	3	7	2	0	0	1	2	0	2	10	10	6	10
83	9	0	151	51.5	22.6	12.04	29	32	33	33	23.49	22.5	23.38	5	12	2	3	1	1	2	1	2	17	10	12	12	22.38	5	11	2	3	1	1	2	0	2	16	11	11	10
84	9	0	154.4	54.5	22.9	12.06	27	29	27	27	26.15	25.65	30.42	1	10	2	3	1	1	0	1	2	11	10	10	10	27.24	3	10	2	3	1	1	0	1	2	13	10	9	9
85	9	0	146.7	50	23.2	12.86	16	19	22	23	27.88	30.51	32.66	1	7	2	1	1	1	0	0	2	8	6	7	8	35.88	1	6	2	2	0	1	0	0	1	7	8	6	8
86	9	0	135.7	45.5	24.7	10.9	27	29	27	30	23.66	24.47	21.48	6	11	2	3	1	1	2	0	2	17	10	10	11	26.68	3	12	2	3	1	1	2	1	2	15	10	11	12
87	9	0	134.5	46	25.4	12.19	18	18	12	18	28.58	26.48	36.45	1	8	2	3	1	1	0	0	1	9	8	8	8	35.81	1	7	1	3	0	1	0	0	2	8	7	8	8
88	9	0	145.5	54	25.5	12.29	20	23	18	22	28.84	29.12	29.84	2	10	2	3	1	1	0	1	2	12	10	10	10	33.42	1	10	2	2	1	1	2	0	2	11	7	8	11
89	9	0	144	54	26	12.3	21	22	29	27	28.19	28.53	23.84	5	10	2	3	1	1	0	1	2	15	11	12	10	18.95	9	13	2	3	1	1	2	2	2	22	13	11	12
90	9	1	144.5	55.1	26.4	9.45	32	35	30	35	21.32	22.07	17.06	10	13	2	3	1	1	2	2	2	23	13	10	13	14.42	13	12	2	2	1	1	2	2	2	25	12	13	13
91	9	0	146.9	60.5	28	10.82	19	21	24	23	26.92	26.18	32.66	1	11	2	3	0	1	2	1	2	12	10	9	10	33.05	1	9	2	0	1	1	1	2	2	10	10	9	12
92	9	0	155	72.5	30.2	12.09	17	25	29	26	26.06	28.62	22.96	5	9	2	3	1	1	0	0	2	14	9	8	9	22.87	5	9	2	3	1	1	0	0	2	14	9	9	11
93	9	0	151.5	75	32.7	10.48	26	25	28	29	27.63	27.71	25.03	4	10	2	3	1	2	0	0	2	14	10	10	10	24.05	4	11	2	3	1	1	2	0	2	15	9	10	11
94	8	0	139	26.8	13.9	11.05	29	25	29	26	24.14	24.63	24.33	4	8	1	3	0	1	1	0	2	12	9	7	10	23.66	5	9	1	3	0	1	2	0	2	14	10	8	9
95	8	0	129.5	23.5	14	10.08	29	33	35	38	23.88	24.87	16.27	11	8	1	0	1	1	2	1	2	19	9	9	10	14.57	13	10	2	0	1	1	2	2	2	23	9	8	9
96	8	1	140	27.7	14.1	10.17	36	36	42	42	20.74	20.78	19.69	8	14	2	3	1	2	2	2	2	22	14	11	14	16.84	11	14	2	3	1	2	2	2	2	25	14	11	14
97	8	0	128.5	23.4	14.2	9.87	25	27	35	36	22.03	25.2	22.15	5	11	2	3	0	1	2	1	2	16	12	11	12	18.64	9	9	2	3	1	1	0	0	2	18	9	8	9
98	8	0	131.5	24.6	14.2	9.61	20	19	24	28	25.11	25.86	20.7	7	11	1	3	1	1	2	1	2	18	11	9	11	21.46	6	11	2	2	1	1	2	1	2	17	10	10	12
99	8	1	130.5	24.8	14.5	8.29	39	40	47	48	19.21	19.15	14.57	13	12	1	3	1	1	2	2	2	25	12	10	12	15.09	12	13	2	3	1	1	2	2	2	25	10	9	11
100	8	1	144.5	30.6	14.7	9.64	30	35	33	43	21.19	21.16	17.21	10	12	2	3	1	1	2	1	2	22	10	9	10	16.28	11	11	2	3	1	1	0	2	2	22	11	10	11
101	8	0	137	28.2	15	8.87	33	36	36	42	19.8	20.37	16.87	11	14	2	3	1	2	2	2	2	25	13	13	14	15.32	12	13	2	3	1	1	2	2	2	25	13	11	13
102	8	1	132	26.5	15.2	8.48	44	43	40	44	20.05	19.2	14.69	13	13	2	3	1	1	2	2	2	26	10	12	12	13.34	14	10	2	2	0	1	2	2	1	24	11	10	10
103	8	1	130.5	26.1	15.3	8.96	32	30	44	41	19.32	19.57	15.41	12	8	2	0	1	1	0	2	2	20	10	10	11	14.16	13	9	1	0	1	1	2	2	2	22	9	9	9
104	8	0	123	23.3	15.4	9.96	25	28	32	30	21.81	21.53	20.74	7	9	2	3	0	1	2	0	1	16	9	8	9	21.31	6	10	2	3	0	1	2	0	2	16	9	7	11
105	8	0	136.5	28.8	15.4	11.06	32	31	38	39	23.47	23.88	22.06	5	12	2	3	0	1	2	2	2	17	9	9	12	18.6	9	11	1	3	1	1	2	1	2	20	12	10	9
106	8	0	139	29.9	15.5	10.46	35	34	31	34	22.57	23.22	17.45	10	12	2	3	1	1	2	1	2	22	13	10	12	15.53	12	14	2	3	1	2	2	2	2	26	13	13	14
107	8	1	143.5	32.2	15.6	9.33	37	36	37	40	20.7	20.64	16.07	11	13	2	3	1	1	2	2	2	24	12	11	13	15.42	12	14	2	3	1	2	2	2	2	26	14	11	14
108	8	0	136.5	29.2	15.7	11.64	23	25	18	22	25.01	26.39	34.77	1	9	2	3	1	1	0	0	2	10	9	9	11	32.85	1	8	2	3	0	1	0	0	2	9	12	7	10
109	8	1	139.5	30.7	15.8	9.47	31	30	26	27	20.78	21.39	17.08	10	9	2	2	1	1	0	1	2	19	8	8	8	17.09	10	8	2	0	1	2	0	1	2	18	11	10	9
110	8	0	138.8	30.5	15.8	11.61	23	23	23	28	26.87	25.95	31.28	1	7	1	3	0	1	0	0	2	8	8	7	8	26.53	3	6	2	0	1	1	0	0	2	9	9	8	10
111	8	1	137	30.1	16	8.82	32	34	31	33	21.23	20.43	17.79	10	6	2	0	0	1	0	1	2	16	9	8	9	16.87	11	9	2	0	1	2	0	2	2	20	9	8	8
112	8	0	132.5	28.2	16.1	10.87	31	33	33	34	25.45	25.1	21.12	6	12	2	3	1	1	2	1	2	18	12	11	12	19.07	8	12	2	3	1	1	2	1	2	20	10	12	12
113	8	1	136.5	30	16.1	9.25	34	33	46	44	19.9	19.59	14.66	13	12	1	3	1	1	2	2	2	25	11	12	11	14.56	13	12	2	3	1	1	2	1	2	25	12	12	12
114	8	1	128.5	27	16.3	10.91	31	30	36	37	22.88	23.43	17.58	10	9	1	3	0	1	0	2	2	19	11	13	13	16.96	11	11	2	2	1	1	1	2	2	22	9	11	11
115	8	0	135	30	16.5	10.23	28	31	37	37	23.52	21.12	27.33	3	11	2	3	0	1	2	1	2	14	11	10	12	24.8	4	9	2	3	1	1	0	1	1	13	10	7	8
116	8	1	135.5	30.4	16.5	9.18	39	38	35	42	19.4	19.69	17.09	10	12	2	3	1	1	2	1	2	22	13	13	13	16.91	11	14	2	3	1	2	2	2	2	25	12	10	13
117	8	0	134.5	30.1	16.6	11.39	27	30	27	28	23.4	24.22	23.55	5	9	2	3	1	1	2	0	0	14	9	9	9	19.06	8	13	2	3	1	1	2	2	2	21	12	10	12
118	8	1	129	28.3	17	9.03	36	34	48	50	19.42	18.86	15.68	12	9	2	2	1	2	0	0	2	21	12	10	10	14.71	13	11	2	2	1	1	2	1	2	24	8	8	10
119	8	0	149	37.7	17	10.16	33	29	31	33	22.63	23.1	20.59	7	11	2	3	0	1	2	1	2	18	12	8	12	17.9	10	12	2	3	1	1	2	2	1	22	10	8	12
120	8	0	140.5	33.6	17	9.21	30	33	30	31	21.96	23.36	16.66	11	13	2	3	1	2	2	1	2	24	12	11	13	16.21	11	13	2	3	1	2	2	1	2	24	13	13	13
121	8	1	132.5	30.3	17.2	9.59	37	36	36	38	20.72	20.94	16.46	11	12	2	3	1	1	2	1	2	23	12	12	12	17.28	10	13	2	3	1	2	2	1	2	23	13	12	13
122	8	1	136	31.9	17.2	12.85	37	36	38	37	21.42	23.06	16.03	11	13	2	3	1	1	2	2	2	24	13	13	13	16.71	11	12	2	2	1	1	2	2	2	23	13	12	13
123	8	0	130.5	29.5	17.3	9.59	24	30	33	36	22.62	21.59	20.12	7	11	2	3	1	1	0	2	2	18	11	11	11	20.29	7	9	2	3	1	1	0	0	2	16	10	7	10
124	8	0	125.5	27.5	17.5	11.84	25	28	34	32	25.06	23.33	27.91	3	9	1	3	0	1	2	0	2	12	9	7	8	24.7	4	7	1	2	1	1	2	0	0	11	7	4	7
125	8	1	142	35.4	17.5	10.04	33	33	36	38	21.72	21.4	17.89	10	14	2	3	1	2	2	2	2	24	13	13	13	17.22	10	13	2	3	1	1	2	2	2	23	12	12	13
126	8	0	145	37.3	17.8	10.61	31	30	20	28	22.47	24.38	20.67	7	12	2	3	1	1	2	1	2	19	13	10	12	19.34	8	11	2	3	1	1	0	2	2	19	12	11	13
127	8	1	141	36.4	18.3	8.29	36	36	34	39	19.96	20.54	14.02	13	13	2	2	1	2	2	2	2	26	10	11	11	14.92	13	10	2	0	1	1	2	2	2	23	12	10	11
128	8	1	136.5	34.5	18.5	9.47	34	36	37	36	22.21	22.46	15.93	12	12	2	2	1	1	2	2	2	24	10	12	12	15.46	12	13	2	3	1	1	2	2	2	25	10	9	12
129	8	0	129	31	18.6	11.09	24	27	27	38	23.78	24.02	33.71	1	11	2	3	1	2	2	0	1	12	11	8	11	25.06	4	9	2	2	1	1	1	0	2	13	11	7	10
130	8	0	138.5	35.8	18.6	11.18	26	24	18	25	25.85	28.29	22.68	5	10	2	3	1	1	0	1	2	15	9	10	10	24.06	4	10	2	2	1	1	2	0	2	14	10	9	9
131	8	0	136	34.6	18.7	10.84	26	25	27	27	23.88	21.94	23.01	5	11	2	2	1	1	1	2	2	16	12	9	12	20.15	7	11	2	2	1	1	2	1	2	18	10	9	11
132	8	0	149.5	42.5	19	10.62	23	23	29	31	24.97	26.41	26.62	3	9	2	3	1	1	0	1	1	12	9	8	8	25.79	4	9	2	3	1	1	0	0	2	13	9	9	10
133	8	0	136	35.8	19.3	10.41	30	29	25	29	24.03	27.59	23.62	5	11	2	3	0	1	2	2	1	16	11	10	12	20.15	7	12	2	3	0	1	2	2	2	19	12	8	13
134	8	0	134.5	35.3	19.5	10.03	28	30	27	33	23.03	24.94	25.5	4	10	2	3	0	1	2	1	1	14	7	8	11	20.93	7	12	2	3	0	1	2	2	2	19	11	12	12
135	8	0	142	39.6	19.6	9.52	34	28	30	31	23.19	23.88	26.28	3	11	2	3	0	1	2	1	2	14	11	8	11	24.68	4	11	2	3	0	1	2	1	2	15	8	6	10
136	8	0	139	38.2	19.8	10.53	26	25	29	34	25.81	27.72	26.31	3	9	1	3	0	1	2	0	2	12	10	8	10	24.06	4	11	2	3	0	1	2	1	2	15	9	6	10
137	8	0	138.5	38.4	20	12.64	19	20	30	29	27.03	29.72	28.63	2	4	1	0	0	1	1	0	1	6	4	5	6	19.87	8	6	0	0	0	2	2	1	1	14	7	6	8
138	8	0	144	41.6	20.1	10.84	30	32	35	41	24.35	24.41	18.74	9	10	0	2	1	1	2	2	2	19	11	10	11	17.31	10	11	0	3	1	1	2	2	2	21	11	8	11
139	8	0	135	36.7	20.1	10.68	24	29	25	29	30.16	27.06	27.4	3	10	2	3	1	1	1	0	2	13	8	10	11	29.63	2	12	2	3	1	2	2	0	2	14	12	12	12
140	8	0	144.5	42.1	20.1	11.28	20	26	24	25	28.94	29.57	27.65	3	13	2	3	1	2	2	1	2	16	13	11	13	27.87	3	12	2	3	1	1	2	1	2	15	12	9	12
141	8	1	131.5	36	20.8	10.19	30	28	36	37	22.32	23.06	17.63	10	11	2	3	1	1	0	2	2	21	13	12	13	16.93	11	12	2	2	1	1	2	2	2	23	8	11	11
142	8	0	139	43.3	22.4	11.03	27	26	20	19	26.25	24.08	24.51	4	11	2	3	1	1	0	2	2	15	11	10	11	22.33	5	12	2	3	1	1	2	1	2	17	12	10	12
143	8	0	132	39.2	22.5	10.48	26	20	25	30	24.74	24.8	21.84	6	11	2	3	0	1	2	1	2	17	12	11	11	20.21	7	10	2	3	1	1	2	0	1	17	9	10	10
144	8	0	141.5	45.2	22.6	10.69	26	29	30	30	27.64	26.93	22.64	5	12	2	3	1	1	2	1	2	17	12	9	12	19.65	8	10	1	3	1	1	2	0	2	18	6	6	10
145	8	0	133.5	41	23	13.07	20	22	25	25	27.56	27.99	29.26	2	12	2	3	1	1	2	1	2	14	12	12	11	25.84	4	10	2	2	1	1	2	0	2	14	10	7	10
146	8	0	148	51.2	23.4	11.98	29	23	24	25	28.52	28	25.42	4	9	2	3	1	1	0	0	2	13	9	8	9	26.68	3	9	2	3	0	1	0	1	2	12	9	8	10
147	8	0	131.5	42.6	24.6	11.4	25	25	26	25	23.97	24.93	28.02	2	11	2	3	1	1	2	0	2	13	8	7	10	26.9	3	12	2	3	1	1	2	1	2	15	12	11	12
148	8	0	150.8	56.5	24.8	10.81	29	27	27	28	24.9	24.62	25.81	4	8	2	3	0	1	0	1	1	12	8	8	10	24.4	4	9	2	3	1	1	0	1	1	13	10	9	12
149	8	0	145.4	59.5	28.1	12.64	24	18	27	27	36.43	32.75	32.64	1	5	1	1	1	0	0	0	2	6	6	5	6	32.46	1	8	1	3	1	1	0	0	2	9	7	6	7
